# Supplementary material
Source: PubMed Central journal article supplement (PMC4216275)
Supplement: supp_131693_inout-fernan-1-at.pdf [file supp_131693_inout-fernan-1-at.pdf]

**Appendix 1 (as supplied by the authors):** Risk of bias for studies included in the systematic review (for reference details, see the reference list in the main article)

| Study                     | Parallel cohorts | Preference design | Same setting | Selection bias | Detection bias | Exclusion bias |
|---------------------------|------------------|-------------------|--------------|----------------|----------------|----------------|
| Akaza et al. 1995         | Yes              | No                | Yes          | Likely         | Unclear        | None           |
| Amar et al. 1997          | Yes              | No                | Yes          | Unlikely       | Likely         | None           |
| Andersson et al. 2003     | Yes              | No                | Yes          | Likely         | Unlikely       | Likely         |
| Antman et al. 1985        | Yes              | No                | Yes          | Likely         | Unclear        | None           |
| Ashok et al. 2002         | Yes              | Yes               | Yes          | Unlikely       | Unlikely       | Likely         |
| Bain et al. 2001          | Yes              | Yes               | Yes          | Unlikely       | Unlikely       | None           |
| Bakker et al. 2000        | Yes              | No                | Yes          | Unlikely       | Unlikely       | Likely         |
| Balmukhanov et al. 1989   | Yes              | No                | Yes          | Unlikely       | Unlikely       | None           |
| Bannister et al. 2001     | Yes              | No                | Yes          | Unlikely       | Unlikely       | None           |
| Bedi et al. 2000          | Yes              | Yes               | Yes          | Unlikely       | Unlikely       | Likely         |
| Bell and Palma 2000       | Yes              | No                | Unclear      | Likely         | Unclear        | Likely         |
| Bhattacharya et al. 1998  | Yes              | No                | Yes          | Unlikely       | Unlikely       | Unclear        |
| Biasoli et al. 2008       | Yes              | No                | Yes          | Likely         | Likely         | Likely         |
| Biederman et al. 1985     | Yes              | No                | Yes          | Unlikely       | Unlikely       | Likely         |
| Bijker et al. 2002        | Yes              | No                | Yes          | Unlikely       | Likely         | Likely         |
| Blichert-Toft et al. 1988 | Yes              | No                | No           | Unlikely       | Unclear        | Unlikely       |
| Blumenthal et al. 1997    | Yes              | No                | No           | Unlikely       | Unlikely       | Likely         |
| Boesen et al. 2007        | Yes              | No                | Yes          | Likely         | Unlikely       | Likely         |
| Boezaart et al. 1998      | Yes              | Yes               | Yes          | Likely         | Unlikely       | None           |
| Brinkhaus et al. 2008     | Yes              | No                | Yes          | Likely         | Unlikely       | Likely         |
| Caplan and Buchanan 1984  | Yes              | No                | No           | Likely         | Unlikely       | None           |
| CASS 1984                 | Yes              | No                | Unclear      | Likely         | Likely         | Likely         |
| Chauhan et al. 1992       | Yes              | No                | Yes          | Unlikely       | Unlikely       | None           |
| Chesebro et al. 1983      | No               | No                | Unclear      | Unlikely       | Unlikely       | None           |
| Chilvers et al. 2001      | Yes              | No                | Yes          | Unlikely       | Unlikely       | Likely         |
| Claggett et al. 1984      | Yes              | No                | Unclear      | Unlikely       | Unlikely       | Likely         |
| Clapp et al. 1989         | Yes              | No                | Yes          | Likely         | Unclear        | None           |
| Clemens et al. 1992       | Yes              | No                | Yes          | Unlikely       | Unclear        | Unclear        |
| Cooper et al. 1997        | Yes              | Yes               | Yes          | Likely         | Unclear        | None           |
| Cowchock et al. 1992      | Yes              | No                | Unclear      | Likely         | Unclear        | None           |
| Creutzig et al. 1993      | Yes              | Yes               | Unclear      | Unlikely       | Unlikely       | None           |
| Dahan et al. 1986         | Yes              | No                | Unclear      | Likely         | Unclear        | None           |
| Dalal et al. 2007         | Yes              | Yes               | Unclear      | Unlikely       | Unlikely       | Likely         |
| Decensi et al. 2003       | Yes              | No                | Yes          | Unlikely       | Unclear        | Likely         |
| Detre et al. 1999         | No               | No                | Yes          | Likely         | Likely         | None           |
| Eberhardt et al. 1996     | Yes              | No                | Yes          | Unlikely       | Unlikely       | Likely         |
| Edsmyr et al. 1978        | Yes              | No                | Unclear      | Likely         | Unlikely       | None           |
| Ekstein et al. 2002       | Yes              | No                | No           | Unlikely       | Likely         | Likely         |
| Emery et al. 2003         | Yes              | Yes               | Yes          | Unlikely       | Unlikely       | Likely         |
| Euler et al. 2005         | Yes              | No                | Yes          | Unlikely       | Unlikely       | None           |
| Feit et al. 2000          | Yes              | No                | No           | Likely         | Likely         | Likely         |
| Forbes and Collins 2000   | Yes              | No                | Yes          | Unlikely       | Unlikely       | None           |
| Franz et al. 1995         | Yes              | No                | Yes          | Unlikely       | Likely         | Likely         |
| Gall et al. 2007          | Yes              | Yes               | Yes          | Unlikely       | Unlikely       | Likely         |
| Girón et al. 2010         | Yes              | No                | Yes          | Unlikely       | Likely         | Likely         |
| Goodkin et al. 1987       | Yes              | No                | No           | Unlikely       | Unlikely       | Unclear        |
| Gossop et al. 1986        | Yes              | Yes               | Yes          | Unlikely       | Unclear        | None           |
| Grant et al. 2008         | Yes              | Yes               | Yes          | Likely         | Unlikely       | Likely         |
| Gunn et al. 2000          | Yes              | No                | Yes          | Likely         | Unlikely       | None           |
| Helsing et al. 1998       | Yes              | No                | Yes          | Unlikely       | Unlikely       | Unclear        |
| Henriksson and Edhaq 1986 | Yes              | No                | Yes          | Likely         | Unlikely       | None           |
| Heuss et al. 2004         | Yes              | No                | Yes          | Unlikely       | Unlikely       | None           |
| Hoh et al. 1998           | Yes              | No                | No           | Unlikely       | Unlikely       | Likely         |
| Howard et al. 2009        | Yes              | Yes               | Yes          | Unlikely       | Unlikely       | Likely         |
| Howie et al. 1997         | Yes              | Yes               | Yes          | Unlikely       | Unclear        | Likely         |
| Jena et al. 2008          | Yes              | No                | No           | Unlikely       | Unlikely       | Likely         |
| Jensen et al. 2003        | Yes              | Yes               | Yes          | Unlikely       | Unlikely       | Likely         |

Appendix to: Fernandes N, Bryant D, Griffith L, et al. Outcomes for patients with the same disease treated inside and outside of randomized trials: a systematic review and meta-analysis. *CMAJ* 2014. DOI:10.1503/cmaj.131693. Copyright © 2014 Canadian Medical Association or its licensors

|                             |     |     |         |          |          |        |
|-----------------------------|-----|-----|---------|----------|----------|--------|
| Kane 1988                   | Yes | No  | Unclear | Likely   | Unlikely | None   |
| Karande et al. 1999         | Yes | No  | Yes     | Unlikely | Unlikely | Likely |
| Kayser et al. 2008          | Yes | Yes | Yes     | Unlikely | Unlikely | None   |
| Kendrick et al. 2001        | Yes | Yes | Yes     | Likely   | Unclear  | Likely |
| Kieler et al. 1998          | Yes | No  | Yes     | Unlikely | Unlikely | Likely |
| King et al. 2000            | Yes | Yes | Yes     | Likely   | Unlikely | Likely |
| Kirke et al. 1992           | Yes | No  | Unclear | Unlikely | Unlikely | Likely |
| Koch-Henriksen et al. 2006  | Yes | No  | Yes     | Unlikely | Unlikely | Likely |
| Lansky and Vance 1983       | Yes | No  | Yes     | Unlikely | Likely   | None   |
| Lichtenberg et al. 2008     | Yes | No  | Unclear | Unlikely | Likely   | None   |
| Lidbrink et al. 1995        | Yes | No  | Unclear | Unlikely | Unclear  | None   |
| Link et al. 1991            | Yes | No  | Yes     | Unlikely | Unlikely | None   |
| Liu et al. 2009             | Yes | No  | Yes     | Unlikely | Unlikely | None   |
| Lock et al. 2010            | Yes | Yes | Yes     | Likely   | Unlikely | Likely |
| Loeffler et al. 1995        | Yes | No  | Yes     | Unlikely | Unclear  | None   |
| Luby et al. 2002            | Yes | No  | Yes     | Unlikely | Unlikely | None   |
| Macdonald et al. 2007       | Yes | No  | Yes     | Unlikely | Unlikely | Likely |
| MacLennan et al. 1985       | Yes | No  | Yes     | Likely   | Unclear  | None   |
| MacMillan et al. 1986       | Yes | No  | Unclear | Likely   | Likely   | Likely |
| Mahon et al. 1996           | Yes | No  | Yes     | Likely   | Unlikely | None   |
| Mahon et al. 1999           | Yes | No  | Yes     | Unlikely | Unlikely | Likely |
| Marcinczyk et al. 1997      | Yes | No  | Yes     | Unlikely | Unclear  | None   |
| Martin et al. 1994          | Yes | No  | Yes     | Unlikely | Likely   | None   |
| Martínez-Amenos et al. 1990 | Yes | No  | Yes     | Likely   | Unlikely | None   |
| Masood et al. 2002          | Yes | No  | Yes     | Likely   | Likely   | None   |
| Matilla et al. 2003         | Yes | No  | Yes     | Unlikely | Unlikely | Likely |
| Mayo Group 1992             | Yes | No  | Unclear | Unlikely | Unlikely | None   |
| McCaughey et al. 1998       | Yes | No  | Yes     | Unlikely | Unlikely | Likely |
| McKay et al. 1998           | Yes | No  | Yes     | Likely   | Unlikely | Likely |
| McKay et al. 1995           | Yes | Yes | Yes     | Likely   | Unlikely | Likely |
| Melchart et al. 2002        | Yes | Yes | Yes     | Unlikely | Unlikely | Likely |
| Moertel et al. 1984         | Yes | No  | Unclear | Unlikely | Unclear  | None   |
| Mori et al. 2006            | Yes | Yes | Yes     | Unlikely | Unlikely | Likely |
| Morrison et al. 2002        | Yes | No  | Yes     | Likely   | Unlikely | None   |
| Nagel et al. 1998           | Yes | Yes | Yes     | Unlikely | Unlikely | None   |
| Neldam et al. 1986          | Yes | No  | Yes     | Unlikely | Unlikely | None   |
| Nicolaides et al. 1994      | Yes | Yes | Yes     | Unlikely | Unlikely | Likely |
| Ogden et al. 2004           | Yes | No  | Unclear | Unlikely | Unlikely | Likely |
| Palmon et al. 1996          | No  | No  | Yes     | Likely   | Unclear  | None   |
| Panagopoulou et al. 2009    | Yes | No  | Yes     | Unlikely | Unlikely | None   |
| Paradise et al. 1984        | Yes | Yes | Yes     | Unlikely | Unlikely | Likely |
| Petersen et al. 2007        | Yes | No  | Yes     | Likely   | Unlikely | Likely |
| Raistrick et al. 2005       | Yes | Yes | Yes     | Unlikely | Unlikely | Likely |
| Reddihough et al. 1998      | Yes | No  | Yes     | Unlikely | Unlikely | Likely |
| Rigg et al. 2000            | Yes | No  | Yes     | Unlikely | Unlikely | None   |
| Rorbye et al. 2005          | Yes | Yes | Yes     | Likely   | Unlikely | Likely |
| Rosen et al. 1987           | Yes | No  | Yes     | Likely   | Unlikely | None   |
| Salisbury et al. 2002       | Yes | No  | Yes     | Unlikely | Unlikely | Likely |
| Sesso et al. 2002           | Yes | No  | Unclear | Likely   | Unlikely | None   |
| Shain et al. 1989           | Yes | Yes | Yes     | Likely   | Unlikely | Likely |
| Smith and Arnesen 1990      | Yes | No  | Yes     | Likely   | Unclear  | None   |
| Smuts et al. 2003           | Yes | No  | Yes     | Unlikely | Likely   | None   |
| Stecksén-Blicks et al. 2008 | Yes | No  | Yes     | Unlikely | Unclear  | Likely |
| Stern et al. 2003           | Yes | No  | Yes     | Unlikely | Unclear  | None   |
| Stith et al. 2004           | Yes | No  | No      | Likely   | Unlikely | Likely |
| Stockton and Mengersen 2009 | Yes | Yes | Yes     | Likely   | Unlikely | Likely |
| Strandberg et al. 1995      | Yes | No  | Yes     | Unlikely | Likely   | Likely |
| Suherman et al. 1999        | Yes | No  | Unclear | Unlikely | Unlikely | Likely |
| Sullivan et al. 1982        | Yes | No  | Unclear | Unlikely | Unlikely | Likely |
| Sundar et al. 2008          | No  | No  | Yes     | Likely   | Unlikely | None   |
| Taddio et al. 2006          | No  | No  | Yes     | Unlikely | Unlikely | Likely |
| Tanai et al. 2009           | Yes | No  | Yes     | Unlikely | Unlikely | None   |

Appendix to: Fernandes N, Bryant D, Griffith L, et al. Outcomes for patients with the same disease treated inside and outside of randomized trials: a systematic review and meta-analysis. *CMAJ* 2014. DOI:10.1503/cmaj.131693. Copyright © 2014 Canadian Medical Association or its licensors

|                                |     |     |         |          |          |        |
|--------------------------------|-----|-----|---------|----------|----------|--------|
| Tanaka et al. 1994             | No  | No  | Unclear | Unlikely | Unlikely | None   |
| Taplin et al. 1986             | Yes | No  | Yes     | Unlikely | Unlikely | None   |
| Tenenbaum et al. 2002          | Yes | No  | No      | Likely   | Likely   | None   |
| Toprak et al. 2005             | Yes | No  | Yes     | Unlikely | Unlikely | None   |
| Underwood et al. 2008          | Yes | Yes | Yes     | Unlikely | Unlikely | Likely |
| Urban et al. 1999              | Yes | No  | Yes     | Likely   | Unlikely | None   |
| Van et al. 2009                | Yes | Yes | Yes     | Unlikely | Unlikely | Likely |
| van Bergen et al. 1995         | Yes | No  | Yes     | Likely   | Likely   | None   |
| Verdonck et al. 1995           | Yes | No  | Unclear | Likely   | Unclear  | None   |
| Vind et al. 2009               | Yes | No  | Unclear | Likely   | Likely   | Likely |
| Walker et al. 1986             | Yes | No  | Yes     | Likely   | Unclear  | Likely |
| Wallage et al. 2003            | Yes | Yes | Yes     | Unlikely | Unlikely | Likely |
| Watzke et al. 2010             | Yes | No  | Yes     | Unlikely | Unlikely | Likely |
| Welt et al. 1981               | Yes | Yes | No      | Likely   | Unclear  | None   |
| West et al. 2005               | Yes | No  | Yes     | Unlikely | Likely   | None   |
| Wetzner et al. 1979            | Yes | No  | Unclear | Likely   | Likely   | None   |
| Wieringa-de Waard et al. 2002  | Yes | Yes | Yes     | Likely   | Unlikely | Likely |
| Williford et al. 1993          | Yes | No  | Unclear | Likely   | Likely   | Likely |
| Witt et al. 2006a              | Yes | No  | Unclear | Likely   | Unlikely | Likely |
| Witt et al. 2006b              | Yes | No  | Yes     | Likely   | Unlikely | Likely |
| Witt et al. 2006c              | Yes | No  | Yes     | Likely   | Unlikely | Likely |
| Witt et al. 2008               | Yes | No  | Yes     | Unlikely | Unlikely | Likely |
| Woodhouse et al. 1995          | Yes | No  | Yes     | Likely   | Unlikely | None   |
| World Health Organization 1988 | Yes | Yes | Yes     | Likely   | Unlikely | Likely |
| Wyse et al. 1991               | Yes | No  | Unclear | Likely   | Likely   | None   |
| Yamamoto et al. 1992           | Yes | No  | Yes     | Likely   | Unlikely | None   |
| Yamani et al. 2005             | Yes | No  | Unclear | Likely   | Unlikely | None   |
| Yersin et al. 1996             | Yes | No  | Yes     | Likely   | Unlikely | Likely |

Note: CASS = Coronary Artery Surgery Study.
