# Supplementary material
Source: PubMed Central journal article supplement (PMC4216275)

**Appendix 4 (as supplied by the authors):** Meta-analyses for randomized controlled trials (RCTs) with continuous outcomes, without randomization of potential participants as “insiders” (participating in the RCT) v. “outsiders” (not participating in the RCT); subgroups are based on effectiveness of trial treatment. Negative values indicate that being an “insider” is favoured. CI = confidence interval, SD = standard deviation. For reference details, see the reference list in the main article.

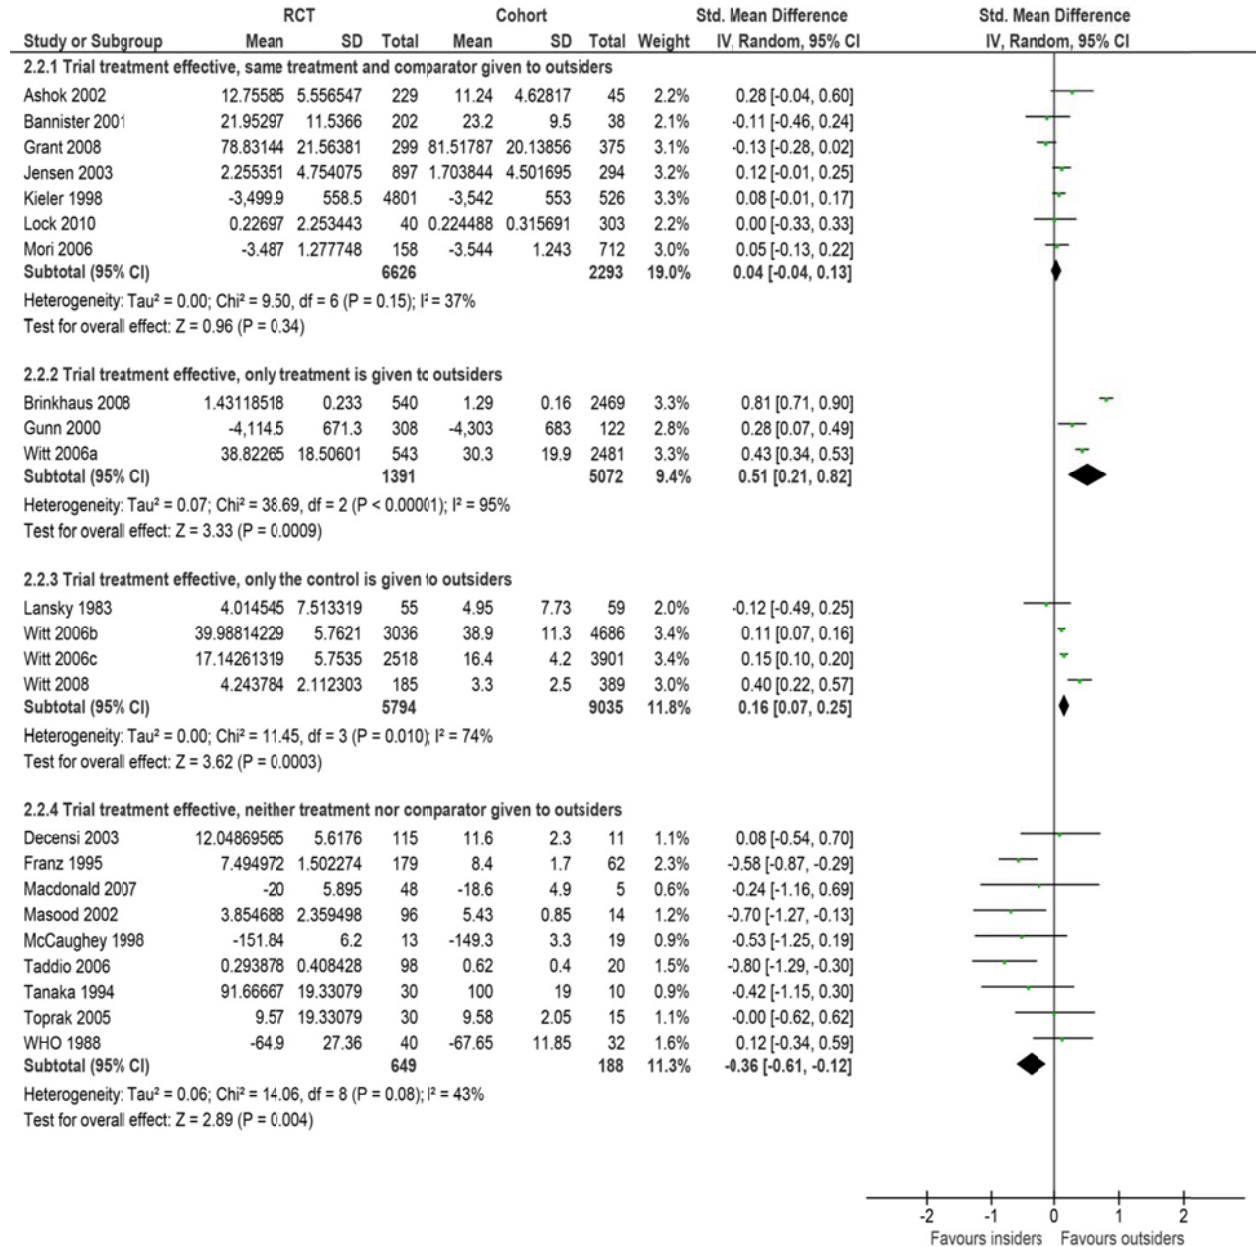

Appendix 4 (continued)

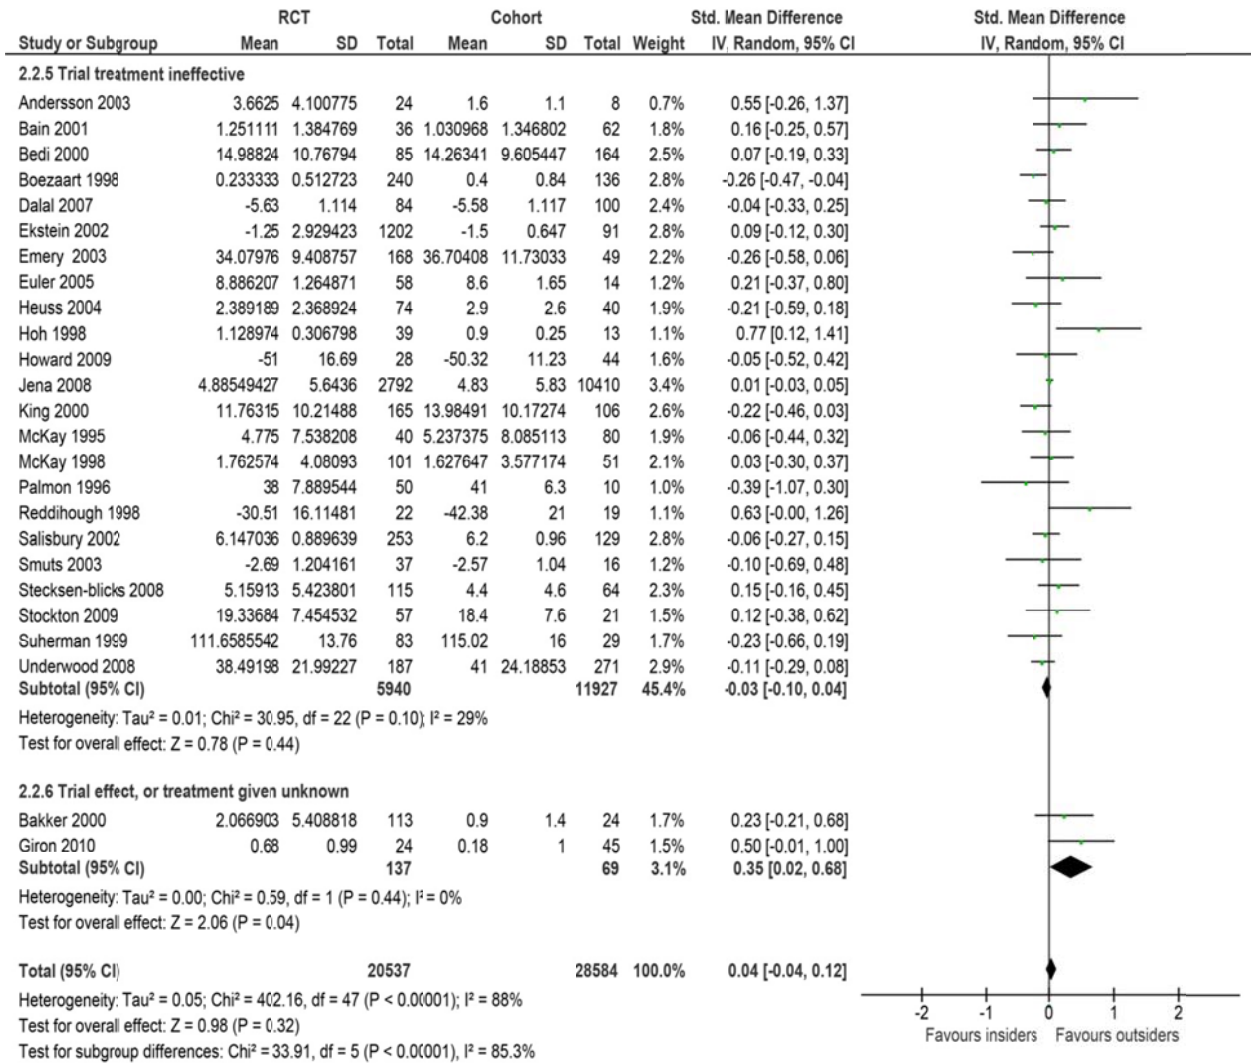

Supplement: supp_131693_inout-fernan-4-at.pdf [file supp_131693_inout-fernan-4-at.pdf]
